# Supplementary material for: Elevated mRNA expression levels of DLGAP5 are associated with poor prognosis in breast cancer
Source: PubMed Central journal article supplement — Oncol Lett. 2020 Apr 10;19(6):4053–65. doi: 10.3892/ol.2020.11533 (PMC7204629; doi:10.3892/ol.2020.11533), 2020-04-10
Supplement: Supplementary_Data.pdf [file Supplementary_Data.pdf]

Figure S1. Standardization of DEG expression levels. (A-C) The standardization of DEGs in the (A) GSE21422, (B) GSE29431 datasets and (C) GSE61304 datasets. The blue and red bars represent the data before and after normalization, respectively. DEG, differentially expressed gene.

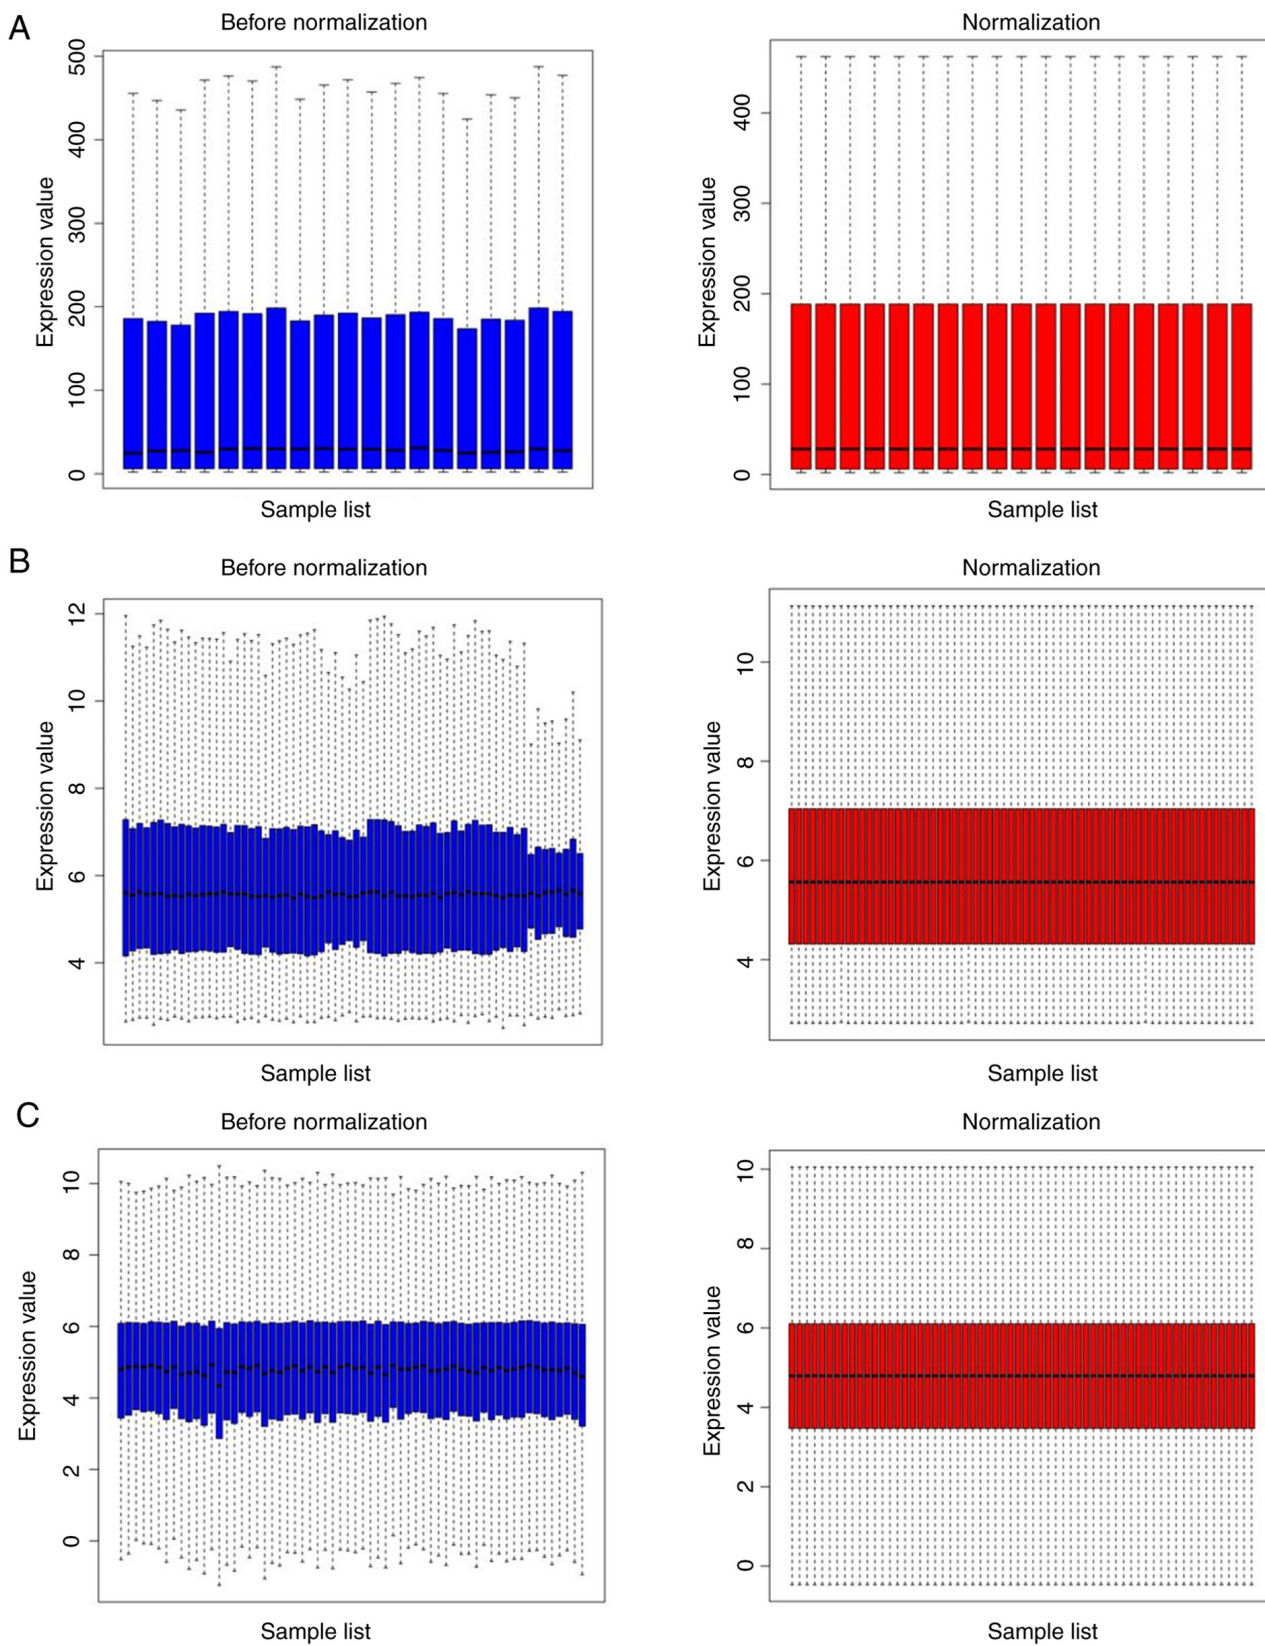

Figure S2. Volcano plots of DEGs in the three different datasets. (A-C) DEGs in the (A) GSE21422, (B) GSE29431 and (C) GSE61304 datasets. The red and green dots represent up- and downregulated DEGs, respectively. The black dots represent genes with no significant difference in expression levels. FC, fold change; DEGs, differentially expressed genes.

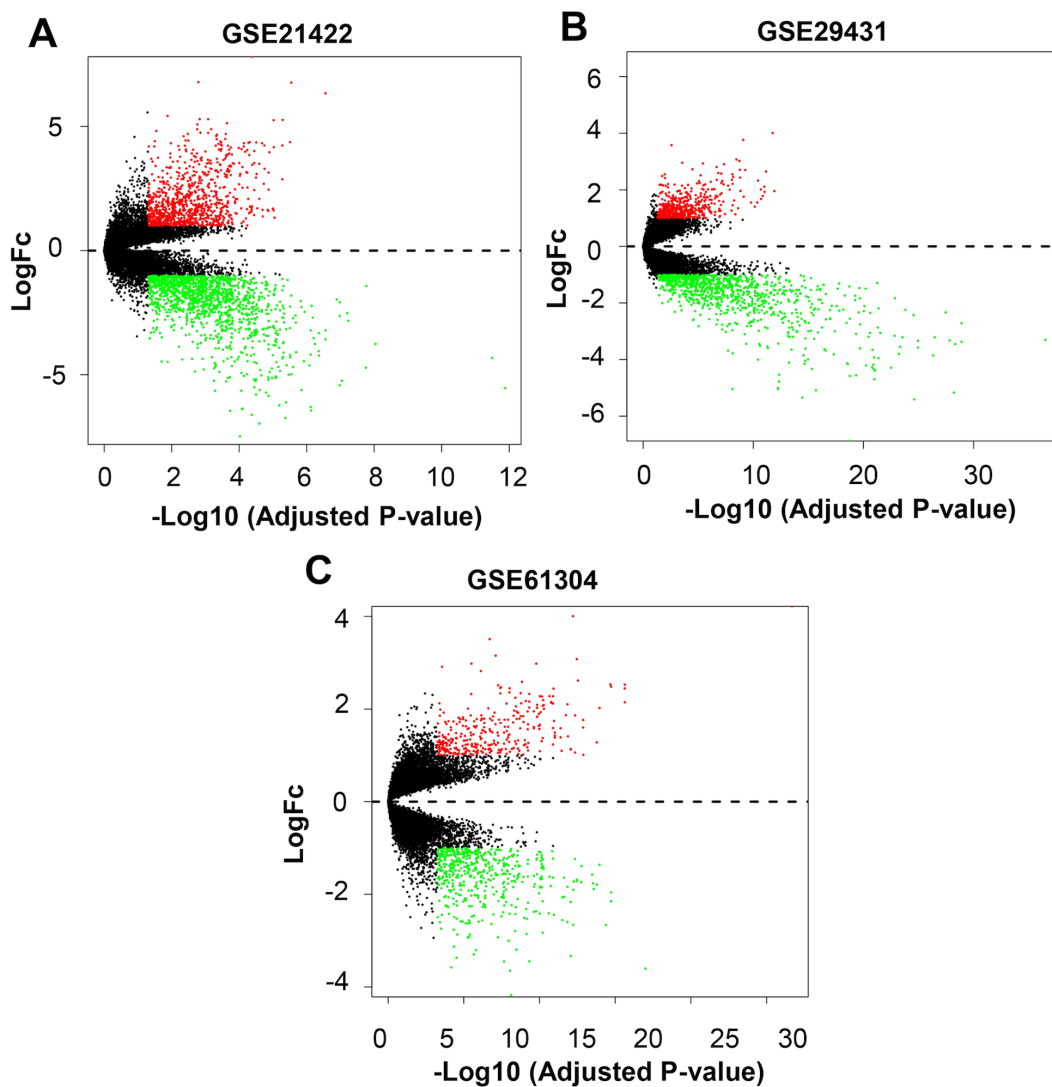

Figure S3. PPI network of module 1 (A) and module 2 (B). Circles represent genes, lines represent interactions between gene-encoded proteins and line colors represent evidence of interactions between proteins.

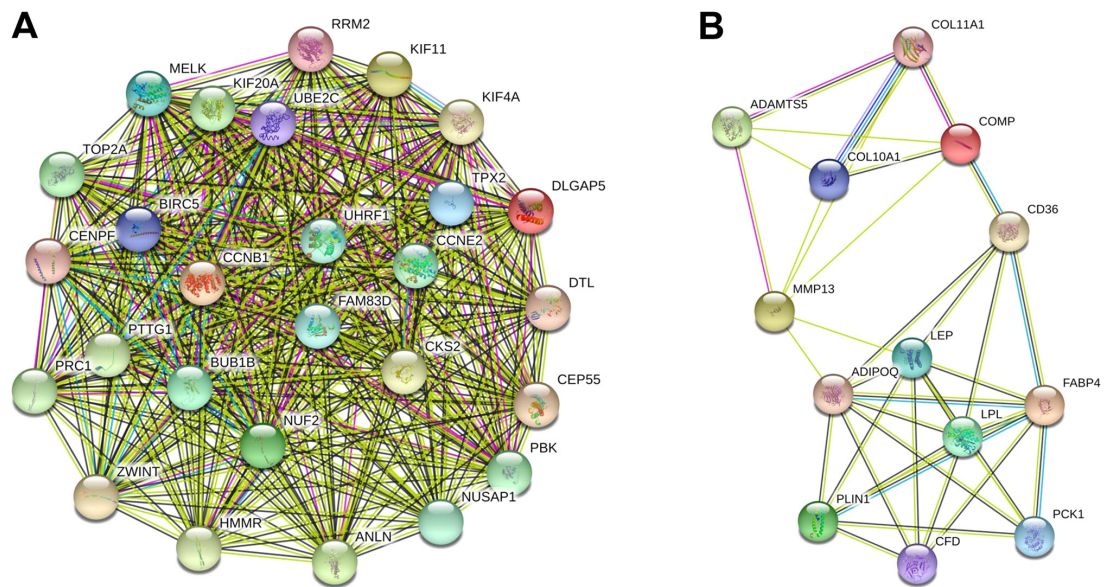

Table SI. Screening differentially expressed genes in patients with breast cancer using the Robust Rank Aggregation method.

| Upregulated genes | log(FC) | P-values               | Downregulated genes | log(FC) | P-values               |
|-------------------|---------|------------------------|---------------------|---------|------------------------|
| COL10A1           | 4.85    | 1.88x10 <sup>-11</sup> | LEP                 | -5.91   | 1.01x10 <sup>-10</sup> |
| COL11A1           | 4.16    | 2.02x10 <sup>-09</sup> | PLIN1               | -4.78   | 1.72x10 <sup>-09</sup> |
| GJB2              | 3.52    | 2.36x10 <sup>-09</sup> | TNMD                | -4.37   | 2.36x10 <sup>-09</sup> |
| COMP              | 3.52    | 1.06x10 <sup>-08</sup> | TIMP4               | -5.05   | 3.58x10 <sup>-09</sup> |
| RRM2              | 3.87    | 1.62x10 <sup>-08</sup> | C2orf40             | -3.91   | 2.51x10 <sup>-08</sup> |
| S100P             | 4.29    | 2.03x10 <sup>-08</sup> | CA4                 | -3.74   | 4.64x10 <sup>-08</sup> |
| CXCL10            | 2.98    | 2.34x10 <sup>-08</sup> | PCK1                | -4.26   | 6.36x10 <sup>-08</sup> |
| ADAMDEC1          | 3.06    | 5.45x10 <sup>-08</sup> | FABP4               | -3.90   | 7.02x10 <sup>-08</sup> |
| MELK              | 2.88    | 7.72x10 <sup>-08</sup> | ADIPOQ              | -3.96   | 7.72x10 <sup>-08</sup> |
| PTTG1             | 2.69    | 8.09x10 <sup>-08</sup> | TMEM132C            | -3.55   | 8.09x10 <sup>-08</sup> |
| UBE2C             | 2.79    | 8.09x10 <sup>-08</sup> | GPIHBP1             | -3.64   | 9.26x10 <sup>-08</sup> |
| FAM83D            | 2.83    | 1.19x10 <sup>-07</sup> | PCOLCE2             | -4.66   | 1.01x10 <sup>-07</sup> |
| NUSAP1            | 2.70    | 1.29x10 <sup>-07</sup> | CHRD1               | -3.56   | 1.05x10 <sup>-07</sup> |
| ANLN              | 2.72    | 1.34x10 <sup>-07</sup> | ADH1B               | -3.66   | 1.05x10 <sup>-07</sup> |
| UHRF1             | 2.91    | 1.45x10 <sup>-07</sup> | PLIN4               | -4.68   | 1.15x10 <sup>-07</sup> |
| MMP1              | 3.27    | 1.87x10 <sup>-07</sup> | AQPEP               | -3.44   | 1.29x10 <sup>-07</sup> |
| HMMR              | 2.46    | 2.77x10 <sup>-07</sup> | MME                 | -3.43   | 1.56x10 <sup>-07</sup> |
| TOP2A             | 2.74    | 3.22x10 <sup>-07</sup> | SDPR                | -3.44   | 1.81x10 <sup>-07</sup> |
| INHBA             | 2.62    | 3.31x10 <sup>-07</sup> | CFD                 | -3.78   | 1.94x10 <sup>-07</sup> |
| KIF4A             | 2.47    | 3.51x10 <sup>-07</sup> | LPL                 | -4.25   | 3.31x10 <sup>-07</sup> |
| DLGAP5            | 2.43    | 4.36x10 <sup>-07</sup> | ADH1C               | -3.32   | 3.41x10 <sup>-07</sup> |
| ZWINT             | 2.51    | 4.72x10 <sup>-07</sup> | MAOA                | -3.76   | 4.14x10 <sup>-07</sup> |
| DTL               | 2.56    | 4.96x10 <sup>-07</sup> | FMO2                | -3.05   | 4.36x10 <sup>-07</sup> |
| NUF2              | 2.47    | 5.22x10 <sup>-07</sup> | LOC101930114        | -3.49   | 4.96x10 <sup>-07</sup> |
| PRC1              | 2.53    | 6.03x10 <sup>-07</sup> | ZBTB16              | -3.72   | 5.09x10 <sup>-07</sup> |
| CEACAM6           | 3.39    | 6.47x10 <sup>-07</sup> | SEMA3G              | -3.34   | 5.61x10 <sup>-07</sup> |
| CEP55             | 2.71    | 7.41x10 <sup>-07</sup> | SLC19A3             | -3.72   | 5.75x10 <sup>-07</sup> |
| CKS2              | 2.81    | 8.98x10 <sup>-07</sup> | TGFBR3              | -2.88   | 5.89x10 <sup>-07</sup> |
| KIF20A            | 2.36    | 8.98x10 <sup>-07</sup> | AOC3                | -3.49   | 6.77x10 <sup>-07</sup> |
| MMP13             | 2.53    | 9.38x10 <sup>-07</sup> | CD36                | -3.01   | 6.93x10 <sup>-07</sup> |
| KIF11             | 2.28    | 1.01x10 <sup>-06</sup> | SFRP1               | -2.73   | 7.91x10 <sup>-07</sup> |
| BUB1B             | 2.68    | 1.03x10 <sup>-06</sup> | TUSC5               | -3.93   | 8.08x10 <sup>-07</sup> |
| CCNB1             | 2.57    | 1.14x10 <sup>-06</sup> | LRRN4CL             | -3.07   | 8.08x10 <sup>-07</sup> |
| PBK               | 2.62    | 1.23x10 <sup>-06</sup> | HLF                 | -2.80   | 1.16x10 <sup>-06</sup> |
| CXCL11            | 2.68    | 1.50x10 <sup>-06</sup> | ITIH5               | -3.44   | 1.25x10 <sup>-06</sup> |
| TPX2              | 2.86    | 1.63x10 <sup>-06</sup> | GPD1                | -3.59   | 1.3x10 <sup>-06</sup>  |
| CENPF             | 2.08    | 1.72x10 <sup>-06</sup> | ADAMTS5             | -2.65   | 1.52x10 <sup>-06</sup> |
| BIRC5             | 2.35    | 1.78x10 <sup>-06</sup> | LOC101926960        | -3.35   | 1.55x10 <sup>-06</sup> |
| GINS1             | 2.26    | 1.86x10 <sup>-06</sup> | SCARA5              | -3.11   | 1.69x10 <sup>-06</sup> |
| CCNE2             | 2.18    | 1.89x10 <sup>-06</sup> | LOC284825           | -3.39   | 1.72x10 <sup>-06</sup> |
|                   |         |                        | ATP1A2              | -2.78   | 1.72x10 <sup>-06</sup> |
|                   |         |                        | PGM5-AS1            | -2.80   | 1.8x10 <sup>-06</sup>  |
|                   |         |                        | SCN4B               | -2.89   | 1.93x10 <sup>-06</sup> |
|                   |         |                        | HOXA5               | -2.81   | 2.15x10 <sup>-06</sup> |
|                   |         |                        | EBF1                | -2.68   | 2.25x10 <sup>-06</sup> |

Table SII. GO and Kyoto Encyclopedia of Genes and Genomes analyses of upregulated genes associated with breast cancer.

| Term       | Description              | Count | P-value                |
|------------|--------------------------|-------|------------------------|
| GO:0051301 | Cell division            | 13    | $1.31 \times 10^{-11}$ |
| GO:0007067 | Mitotic nuclear division | 11    | $1.80 \times 10^{-10}$ |
| GO:0005819 | Spindle                  | 7     | $2.06 \times 10^{-7}$  |
| GO:0000281 | Mitotic cytokinesis      | 5     | $5.66 \times 10^{-7}$  |
| GO:0005876 | Spindle microtubule      | 5     | $2.30 \times 10^{-6}$  |
| GO:0008017 | Microtubule binding      | 7     | $7.57 \times 10^{-6}$  |
| GO:0030496 | Midbody                  | 6     | $7.80 \times 10^{-6}$  |
| GO:0008283 | Cell proliferation       | 8     | $1.86 \times 10^{-5}$  |
| GO:0019901 | Protein kinase binding   | 8     | $2.15 \times 10^{-5}$  |
| GO:0000922 | Spindle pole             | 5     | $8.48 \times 10^{-5}$  |
| hsa04110   | Cell cycle               | 4     | $2.22 \times 10^{-3}$  |
| hsa04115   | P53 signaling pathway    | 3     | $9.04 \times 10^{-3}$  |
| hsa04512   | ECM-receptor interaction | 3     | $1.49 \times 10^{-2}$  |
| hsa04114   | Oocyte meiosis           | 3     | $2.36 \times 10^{-2}$  |

Count, number of enriched genes in each term; GO, Gene Ontology; hsa, homosapien.

Table III. GO and Kyoto Encyclopedia of Genes and Genomes analyses of downregulated genes associated in breast cancer.

| Term       | Description                                | Count | P-value               |
|------------|--------------------------------------------|-------|-----------------------|
| GO:0009986 | Cell surface                               | 8     | 1.33x10 <sup>-4</sup> |
| GO:0008201 | Heparin binding                            | 5     | 2.57x10 <sup>-4</sup> |
| GO:0005615 | Extracellular space                        | 11    | 4.12x10 <sup>-4</sup> |
| GO:0071356 | Cellular response to tumor necrosis factor | 4     | 1.54x10 <sup>-3</sup> |
| GO:0014823 | Response to activity                       | 3     | 3.61x10 <sup>-3</sup> |
| GO:0070543 | Response to linoleic acid                  | 2     | 4.16x10 <sup>-3</sup> |
| GO:0006629 | Lipid metabolic process                    | 4     | 4.21x10 <sup>-3</sup> |
| GO:0071320 | Cellular response to camp                  | 3     | 5.24x10 <sup>-3</sup> |
| GO:0005576 | Extracellular region                       | 10    | 5.95x10 <sup>-3</sup> |
| GO:0042632 | Cholesterol homeostasis                    | 3     | 7.85x10 <sup>-3</sup> |
| hsa03320   | PPAR signaling pathway                     | 6     | 1.36x10 <sup>-5</sup> |
| hsa00350   | Tyrosine metabolism                        | 4     | 1.51x10 <sup>-5</sup> |
| hsa00982   | Drug metabolism-cytochrome P450            | 4     | 1.08x10 <sup>-3</sup> |
| hsa04920   | Adipocytokine signaling pathway            | 4     | 1.12x10 <sup>-3</sup> |
| hsa04964   | Proximal tubule bicarbonate reclamation    | 3     | 2.16x10 <sup>-3</sup> |
| hsa04152   | AMPK signaling pathway                     | 4     | 5.86x10 <sup>-3</sup> |
| hsa00010   | Glycolysis/gluconeogenesis                 | 3     | 1.74x10 <sup>-2</sup> |

GO, Gene Ontology; hsa, homosapien.



Table SIV. Basic information of tissue samples used analyzed using immunohistochemistry.

| Age, years | Pathology diagnosis       | TNM stage | Clinical stage | Expression levels |      |     |
|------------|---------------------------|-----------|----------------|-------------------|------|-----|
|            |                           |           |                | PR                | HER2 | ER  |
| 75         | Invasive ductal carcinoma | T3N1M0    | IIIA           | +++               | 0    | +++ |
| 54         | Invasive ductal carcinoma | T2N2M0    | IIIA           | *                 | *    | *   |
| 38         | Invasive ductal carcinoma | T2N1M0    | IIB            | ++                | 0    | +++ |
| 69         | Invasive ductal carcinoma | T2N1M0    | IIB            | -                 | 0    | -   |
| 72         | Invasive ductal carcinoma | T2N0M0    | IIA            | +++               | 0    | +++ |
| 40         | Invasive ductal carcinoma | T2N0M0    | IIA            | -                 | 0    | -   |
| 42         | Invasive ductal carcinoma | T1N0M0    | IA             | +++               | 0    | +++ |
| 61         | Invasive ductal carcinoma | T4N0M0    | IIIB           | ++                | 0    | +++ |
| 41         | Invasive ductal carcinoma | T2N0M0    | IIA            | +++               | 0    | +++ |
| 64         | Invasive ductal carcinoma | T2N0M0    | IIA            | -                 | 0    | ++  |
| 46         | Invasive ductal carcinoma | T3N0M0    | IIB            | +++               | 0    | ++  |
| 48         | Invasive ductal carcinoma | T4N2M0    | IIIB           | +++               | 0    | +++ |
| 50         | Invasive ductal carcinoma | T2N1M0    | IIB            | +++               | 0    | +++ |
| 47         | Invasive ductal carcinoma | T1N0M0    | IA             | -                 | 0    | +   |
| 48         | Invasive ductal carcinoma | T2N1M0    | IIB            | -                 | 0    | +   |
| 38         | Invasive ductal carcinoma | T2N1M0    | IIB            | -                 | 0    | -   |
| 51         | Invasive ductal carcinoma | T2N0M0    | IIA            | -                 | 0    | +++ |
| 60         | Invasive ductal carcinoma | T2N0M0    | IIA            | *                 | *    | *   |
| 57         | Invasive ductal carcinoma | T2N1M0    | IIB            | *                 | 0    | *   |
| 50         | Invasive ductal carcinoma | T4N2M0    | IIIB           | +++               | 3+   | +++ |
| 44         | Invasive ductal carcinoma | T4N0M0    | IIIB           | +                 | 0    | +++ |
| 32         | Invasive ductal carcinoma | T3N1M0    | IIIA           | ++                | 0    | +   |
| 49         | Invasive ductal carcinoma | T2N2M0    | IIIA           | -                 | 0    | +++ |
| 38         | Invasive ductal carcinoma | T2N0M0    | IIA            | +++               | 0    | +++ |
| 50         | Invasive ductal carcinoma | T3N0M0    | IIB            | +++               | 0    | +++ |
| 43         | Invasive ductal carcinoma | T2N1M0    | IIB            | +++               | 0    | +++ |
| 46         | Invasive ductal carcinoma | T2N0M0    | IIA            | +                 | 0    | +++ |
| 43         | Invasive ductal carcinoma | T1N1M0    | IIA            | -                 | 0    | ++  |
| 70         | Invasive ductal carcinoma | T2N0M0    | IIA            | -                 | 0    | +   |
| 39         | Invasive ductal carcinoma | T2N1M0    | IIB            | +++               | 0    | ++  |
| 41         | Invasive ductal carcinoma | T2N2M0    | IIIA           | +++               | 0    | +++ |
| 52         | Invasive ductal carcinoma | T2N1M0    | IIB            | +++               | 3+   | +   |
| 60         | Invasive ductal carcinoma | T1N0M0    | IA             | +                 | 0    | +++ |
| 45         | Invasive ductal carcinoma | T1N0M0    | IA             | +++               | 0    | +++ |
| 43         | Invasive ductal carcinoma | T2N1M0    | IIB            | +                 | 0    | +++ |
| 38         | Invasive ductal carcinoma | T2N0M0    | IIA            | +++               | 0    | +++ |
| 38         | Invasive ductal carcinoma | T2N0M0    | IIA            | +++               | 0    | ++  |
| 47         | Invasive ductal carcinoma | T2N0M0    | IIA            | *                 | *    | *   |
| 47         | Invasive ductal carcinoma | T4N0M0    | IIIB           | +                 | 3+   | +   |
| 49         | Invasive ductal carcinoma | T2N0M0    | IIA            | ++                | 3+   | ++  |
| 46         | Invasive ductal carcinoma | T2N0M0    | IIA            | -                 | 3+   | -   |
| 45         | Invasive ductal carcinoma | T4N2M0    | IIIB           | +++               | 0    | +++ |
| 54         | Invasive ductal carcinoma | T2N1M0    | IIB            | -                 | 0    | ++  |
| 30         | Invasive ductal carcinoma | T2N0M0    | IIA            | +++               | 0    | +   |
| 46         | Invasive ductal carcinoma | T2N1M0    | IIB            | +++               | 0    | +++ |
| 52         | Invasive ductal carcinoma | T2N0M0    | IIA            | +                 | 0    | ++  |
| 71         | Invasive ductal carcinoma | T4N2M0    | IIIB           | ++                | 0    | +++ |
| 48         | Invasive ductal carcinoma | T2N2M0    | IIIA           | +                 | 0    | ++  |
| 49         | Invasive ductal carcinoma | T2N0M0    | IIA            | -                 | 0    | +++ |
| 54         | Invasive ductal carcinoma | T2N2M0    | IIIA           | ++                | 0    | +++ |
| 43         | Invasive ductal carcinoma | T2N1M0    | IIB            | +++               | 0    | +++ |
| 56         | Invasive ductal carcinoma | T2N0M0    | IIA            | -                 | 0    | -   |
| 57         | Invasive ductal carcinoma | T2N1M0    | IIB            | -                 | 0    | +++ |
| 52         | Invasive ductal carcinoma | T1N0M0    | IA             | +                 | 0    | ++  |
| 52         | Invasive ductal carcinoma | T2N0M0    | IIA            | ++                | 0    | +++ |
| 37         | Invasive ductal carcinoma | T2N0M0    | IIA            | +++               | 0    | +   |
| 40         | Invasive ductal carcinoma | T1N1M0    | IIA            | -                 | 0    | +   |

Table SIV. Continued.

| Age, years | Pathology diagnosis        | TNM stage | Clinical stage | Expression levels |      |     |
|------------|----------------------------|-----------|----------------|-------------------|------|-----|
|            |                            |           |                | PR                | HER2 | ER  |
| 54         | Invasive ductal carcinoma  | T2N1M0    | IIB            | -                 | 0    | ++  |
| 39         | Invasive ductal carcinoma  | T2N2M0    | IIIA           | -                 | 3+   | +   |
| 50         | Invasive ductal carcinoma  | T2N0M0    | IIA            | -                 | *    | ++  |
| 60         | Invasive ductal carcinoma  | T2N0M0    | IIA            | +                 | 0    | +++ |
| 38         | Invasive ductal carcinoma  | T2N1M0    | IIB            | +++               | 0    | +++ |
| 54         | Invasive ductal carcinoma  | T2N1M0    | IIB            | -                 | 0    | +++ |
| 46         | Invasive ductal carcinoma  | T2N0M0    | IIA            | ++                | 0    | +++ |
| 59         | Invasive ductal carcinoma  | T2N0M0    | IIA            | -                 | 0    | -   |
| 74         | Invasive ductal carcinoma  | T2N0M0    | IIA            | +++               | 0    | +++ |
| 29         | Invasive ductal carcinoma  | T2N0M0    | IIA            | -                 | 3+   | -   |
| 52         | Invasive ductal carcinoma  | T3N0M0    | IIB            | -                 | 0    | ++  |
| 43         | Invasive ductal carcinoma  | T2N0M0    | IIA            | -                 | 3+   | -   |
| 56         | Invasive ductal carcinoma  | T2N2M0    | IIIA           | +++               | 3+   | +++ |
| 44         | Invasive ductal carcinoma  | T2N0M0    | IIA            | -                 | 0    | -   |
| 62         | Invasive ductal carcinoma  | T2N1M0    | IIB            | -                 | 0    | -   |
| 47         | Invasive ductal carcinoma  | T2N0M0    | IIA            | -                 | 0    | +++ |
| 41         | Invasive ductal carcinoma  | T3N1M0    | IIIA           | ++                | 0    | ++  |
| 51         | Invasive ductal carcinoma  | T3N1M0    | IIIA           | -                 | 3+   | -   |
| 39         | Invasive ductal carcinoma  | T4N2M0    | IIIB           | -                 | 0    | -   |
| 49         | Invasive ductal carcinoma  | T2N2M0    | IIIA           | -                 | 2+   | -   |
| 52         | Invasive ductal carcinoma  | T1N1M0    | IIA            | -                 | 0    | +++ |
| 56         | Invasive ductal carcinoma  | T1N0M0    | IA             | ++                | 0    | +++ |
| 65         | Invasive ductal carcinoma  | T4N1M0    | IIIB           | +++               | 0    | +++ |
| 38         | Adjacent normal tissue     | -         | -              | +                 | 0    | +   |
| 49         | Adjacent normal tissue     | -         | -              | *                 | *    | *   |
| 45         | Adjacent normal tissue     | -         | -              | -                 | 0    | +   |
| 51         | Adjacent normal tissue     | -         | -              | -                 | 0    | ++  |
| 40         | Adjacent normal tissue     | -         | -              | -                 | 0    | -   |
| 50         | Adjacent normal tissue     | -         | -              | *                 | *    | *   |
| 40         | Adjacent normal tissue     | -         | -              | *                 | *    | *   |
| 43         | Adjacent normal tissue     | -         | -              | ++                | 0    | +   |
| 35         | Adjacent normal tissue     | -         | -              | *                 | *    | *   |
| 54         | Adjacent normal tissue     | -         | -              | *                 | *    | *   |
| 43         | Adjacent normal tissue     | -         | -              | +                 | 0    | ++  |
| 27         | Breast tissue              | -         | -              | +                 | 0    | -   |
| 50         | Breast tissue              | -         | -              | *                 | *    | *   |
| 42         | Breast tissue              | -         | -              | *                 | *    | *   |
| 19         | Breast tissue              | -         | -              | *                 | *    | *   |
| 21         | Breast tissue              | -         | -              | *                 | *    | *   |
| 41         | Invasive lobular carcinoma | T4N0M0    | IIIB           | +                 | 0    | +   |
| 66         | Invasive lobular carcinoma | T2N0M0    | IIA            | -                 | 0    | +++ |
| 70         | Invasive lobular carcinoma | T4N0M0    | IIIB           | -                 | 0    | ++  |
| 57         | Invasive lobular carcinoma | T2N0M0    | IIA            | +++               | 0    | +++ |
| 38         | Invasive lobular carcinoma | T2N0M0    | IIA            | +++               | 0    | +++ |
| 72         | Invasive lobular carcinoma | T1N0M0    | IA             | -                 | 0    | +++ |
| 59         | Invasive lobular carcinoma | T2N0M0    | IIA            | ++                | 0    | ++  |
| 47         | Invasive lobular carcinoma | T2N1M0    | IIB            | +                 | 0    | ++  |
| 37         | Invasive lobular carcinoma | T4N1M0    | IIIB           | +                 | 0    | +   |
| 51         | Invasive lobular carcinoma | T2N1M0    | IIB            | *                 | *    | *   |
| 35         | Invasive lobular carcinoma | T3N0M0    | IIB            | +++               | 0    | +++ |
| 73         | Invasive lobular carcinoma | T4N0M0    | IIIB           | -                 | 0    | -   |
| 42         | Invasive lobular carcinoma | T1N0M0    | IA             | ++                | 0    | +++ |
| 45         | Invasive lobular carcinoma | T2N0M0    | IIA            | ++                | 0    | ++  |
| 51         | Invasive lobular carcinoma | T4N0M0    | IIIB           | ++                | 0    | ++  |
| 48         | Invasive lobular carcinoma | T2N0M0    | IIA            | +++               | 0    | +++ |
| 47         | Invasive lobular carcinoma | T3N0M0    | IIB            | ++                | 0    | ++  |
| 47         | Invasive lobular carcinoma | T4N0M0    | IIIB           | +++               | 0    | +++ |



Table SIV. Continued.

| Age, years | Pathology diagnosis        | TNM stage | Clinical stage | Expression levels |      |     |
|------------|----------------------------|-----------|----------------|-------------------|------|-----|
|            |                            |           |                | PR                | HER2 | ER  |
| 52         | Invasive lobular carcinoma | T2N1M0    | IIB            | -                 | 0    | -   |
| 50         | Invasive lobular carcinoma | T2N0M0    | IIA            | +++               | 0    | +++ |
| 68         | Invasive lobular carcinoma | T2N0M0    | IIA            | -                 | 0    | ++  |
| 53         | Invasive lobular carcinoma | T4N1M0    | IIIB           | +                 | 0    | +++ |
| 58         | Invasive lobular carcinoma | T1N0M0    | IA             | +                 | 0    | +++ |
| 39         | Invasive lobular carcinoma | T2N0M0    | IIA            | ++                | 0    | ++  |
| 49         | Invasive lobular carcinoma | T3N2M0    | IIIA           | -                 | 0    | +   |
| 52         | Invasive lobular carcinoma | T2N0M0    | IIA            | -                 | 0    | -   |
| 42         | Invasive lobular carcinoma | T3N0M0    | IIB            | -                 | 3+   | +   |
| 70         | Invasive lobular carcinoma | T2N2M0    | IIIA           | +                 | 2+   | +++ |
| 43         | Invasive lobular carcinoma | T2N0M0    | IIA            | +++               | 0    | +++ |
| 47         | Lobular carcinoma in situ  | T2N0M0    | IIA            | ++                | 0    | +++ |
| 49         | Invasive lobular carcinoma | T2N0M0    | IIA            | -                 | 0    | -   |
| 46         | Invasive lobular carcinoma | T2N0M0    | IIA            | -                 | 0    | ++  |
| 52         | Invasive lobular carcinoma | T4N0M0    | IIIB           | +                 | 0    | +++ |
| 58         | Invasive lobular carcinoma | T2N0M0    | IIA            | +++               | 0    | +++ |
| 49         | Invasive lobular carcinoma | T3N1M0    | IIIA           | +                 | 0    | +++ |
| 39         | Invasive lobular carcinoma | T2N3M0    | IIIC           | -                 | 0    | +   |
| 63         | Invasive lobular carcinoma | T3N0M0    | IIB            | -                 | 0    | -   |
| 49         | Invasive lobular carcinoma | T2N0M0    | IIA            | +                 | 0    | ++  |
| 41         | Invasive lobular carcinoma | T2N0M0    | IIA            | ++                | 0    | +   |
| 37         | Invasive lobular carcinoma | T3N0M0    | IIB            | -                 | 3+   | -   |
| 64         | Invasive lobular carcinoma | T2N0M0    | IIA            | ++                | 0    | +++ |
| 72         | Invasive lobular carcinoma | T2N1M0    | IIB            | +                 | 1+   | +   |
| 31         | Invasive lobular carcinoma | T2N0M0    | IIA            | -                 | 1+   | -   |
| 58         | Invasive lobular carcinoma | T2N0M0    | IIA            | +++               | 0    | +++ |
| 55         | Invasive lobular carcinoma | T2N0M0    | IIA            | ++                | 0    | +++ |
| 53         | Invasive lobular carcinoma | T2N0M0    | IIA            | +                 | 0    | ++  |
| 50         | Invasive lobular carcinoma | T1N0M0    | IA             | +++               | 0    | +++ |
| 52         | Invasive lobular carcinoma | T2N1M0    | IIB            | -                 | 2+   | -   |
| 60         | Invasive lobular carcinoma | T2N0M0    | IIA            | +++               | 0    | +++ |
| 40         | Invasive lobular carcinoma | T2N1M0    | IIB            | +                 | 0    | +   |
| 40         | Invasive lobular carcinoma | T2N0M0    | IIA            | -                 | 0    | +++ |
| 66         | Invasive lobular carcinoma | T2N0M0    | IIA            | +++               | 0    | +++ |
| 48         | Invasive lobular carcinoma | T2N1M0    | IIB            | ++                | 1+   | +++ |
| 44         | Invasive lobular carcinoma | T2N2M0    | IIIA           | -                 | 0    | +   |
| 60         | Invasive lobular carcinoma | T2N1M0    | IIB            | -                 | 0    | +++ |
| 50         | Invasive lobular carcinoma | T2N2M0    | IIIA           | +                 | 0    | +   |
| 57         | Invasive lobular carcinoma | T2N0M0    | IIA            | -                 | 3+   | -   |
| 46         | Invasive lobular carcinoma | T2N0M0    | IIA            | -                 | 0    | -   |
| 47         | Invasive lobular carcinoma | T2N0M0    | IIA            | ++                | 0    | +++ |
| 46         | Invasive lobular carcinoma | T2N0M0    | IIA            | *                 | *    | *   |
| 64         | Invasive lobular carcinoma | T2N0M0    | IIA            | -                 | 0    | +++ |
| 44         | Invasive lobular carcinoma | T2N0M0    | IIA            | ++                | 0    | +++ |
| 54         | Invasive lobular carcinoma | T2N1M0    | IIB            | +++               | 0    | +++ |
| 50         | Invasive lobular carcinoma | T2N1M0    | IIB            | -                 | 0    | -   |
| 59         | Invasive lobular carcinoma | T2N0M0    | IIA            | *                 | *    | *   |
| 36         | Invasive lobular carcinoma | T3N1M0    | IIIA           | +++               | 0    | ++  |
| 47         | Invasive lobular carcinoma | T4N0M0    | IIIB           | ++                | 0    | +++ |
| 60         | Invasive lobular carcinoma | T3N0M0    | IIB            | -                 | 0    | +++ |
| 39         | Invasive lobular carcinoma | T3N0M0    | IIB            | +++               | 0    | +++ |
| 47         | Invasive lobular carcinoma | T2N0M0    | IIA            | -                 | 0    | +++ |
| 55         | Invasive lobular carcinoma | T2N2M0    | IIIA           | -                 | 3+   | ++  |
| 45         | Invasive lobular carcinoma | T2N0M0    | IIA            | +++               | 0    | +++ |
| 45         | Invasive lobular carcinoma | T2N1M0    | IIB            | +++               | 0    | +++ |
| 54         | Invasive lobular carcinoma | T2N1M0    | IIB            | -                 | 0    | +   |
| 48         | Invasive lobular carcinoma | T3N0M0    | IIB            | *                 | *    | *   |

Table SIV. Continued.

| Age, years | Pathology diagnosis        | TNM stage | Clinical stage | Expression levels |      |     |
|------------|----------------------------|-----------|----------------|-------------------|------|-----|
|            |                            |           |                | PR                | HER2 | ER  |
| 45         | Invasive lobular carcinoma | T2N1M0    | IIB            | +                 | 0    | ++  |
| 51         | Invasive lobular carcinoma | T2N0M0    | IIA            | +++               | 0    | +++ |
| 56         | Invasive lobular carcinoma | T2N0M0    | IIA            | -                 | 0    | +++ |
| 65         | Invasive lobular carcinoma | T2N0M0    | IIA            | +                 | 0    | -   |
| 35         | Invasive lobular carcinoma | T1N0M0    | IA             | ++                | 2+   | +++ |
| 54         | Adjacent normal tissue     | -         | -              | *                 | *    | *   |
| 48         | Adjacent normal tissue     | -         | -              | ++                | 0    | +   |
| 54         | Adjacent normal tissue     | -         | -              | *                 | *    | *   |
| 43         | Adjacent normal tissue     | -         | -              | -                 | 0    | *   |
| 55         | Adjacent normal tissue     | -         | -              | -                 | 0    | +   |
| 42         | Adjacent normal tissue     | -         | -              | *                 | *    | *   |
| 47         | Cancer adjacent tissue     | -         | -              | +                 | *    | +   |
| 40         | Cancer adjacent tissue     | -         | -              | +                 | 0    | +   |
| 45         | Cancer adjacent tissue     | -         | -              | *                 | *    | *   |
| 42         | Adjacent normal tissue     | -         | -              | +++               | 0    | +   |
| 46         | Cancer adjacent tissue     | -         | -              | *                 | *    | *   |
| 48         | Adjacent normal tissue     | -         | -              | +                 | 0    | -   |
| 36         | Adjacent normal tissue     | -         | -              | *                 | *    | *   |
| 33         | Adjacent normal tissue     | -         | -              | -                 | 0    | +   |
| 36         | Breast tissue              | -         | -              | +                 | 0    | +   |
| 35         | Breast tissue              | -         | -              | +                 | 0    | *   |

Note: '\*' means the value is missing; '+', '++' and '+++' mean weak, medium and strong expression, respectively. '3+' means HER2 is positive and '0-1+' means negative, while '2+' means the sample required FISH analysis to determine whether HER2 status was positive or negative. ER, estrogen receptor; PR, progesterone receptor; HER2, human epidermal growth factor receptor-2; TNM, Tumor-Node-Metastasis.
